# Supplementary material for: Soil carbon release responses to long-term versus short-term climatic warming in an arid ecosystem
Source: Copernicus journal article supplement (doi:10.5194/bg-2019-236), 2019-07-18
Supplement: Supplementary file [file bg-2019-236-AC2-supplement.pdf]

1 **Soil carbon release responses to long-term versus short-term climatic**  
2 **warming in an arid ecosystem**

3  
4 Hongying Yu<sup>1,2</sup>, Zhenzhu Xu<sup>1,\*</sup>, Guangsheng Zhou<sup>1,3,\*</sup>, and Yaohui Shi<sup>1,3</sup>

5 <sup>1</sup>State Key Laboratory of Vegetation and Environmental Change, Institute of Botany,  
6 Chinese Academy of Sciences, Beijing 100093, China

7 <sup>2</sup>University of Chinese Academy of Sciences, Beijing, 100049, China

8 <sup>3</sup>Chinese Academy of Meteorological Sciences, China Meteorological Administration,  
9 Beijing 100081, China

10 \*Authors for correspondence

11  
12 **Abstract.** Climate change severely impacts grassland carbon cycling such as the  
13 changes in litter decomposition and soil respiration ( $R_s$ ), especially in desert  
14 steppes. However, little is known about the  $R_s$  responses to different warming  
15 magnitudes and watering pulses *in situ* in desert steppes. To examine their effects  
16 on  $R_s$ , we conducted long-term moderate warming (four-year, around 3°C), and  
17 short-term acute warming (one-year, around 4°C), and watering field experiments  
18 in a desert grassland of Northern China. While experimental warming significantly  
19 reduced  $R_s$  by 32.5% and 40.8% under long-term moderate and short-term acute  
20 warming regimes, respectively, watering pulses (fully irrigated the soil to field  
21 capacity) stimulated it substantially. This indicates that climatic warming  
22 constrains soil carbon release, which is controlled mainly by decreased soil  
23 moisture, consequently influencing soil carbon dynamics. Warming did not change  
24 the exponential relationship between  $R_s$  and soil temperature, whereas the  
25 relationship between  $R_s$  and soil moisture was better fitted to a sigmoid function.  
26 The belowground biomass, soil nutrition, and microbial biomass were not  
27 significantly affected by either long-term or short-term warming regimes,  
28 respectively. The results of this study highlight the great dependence of soil carbon  
29 emission on warming regimes of different durations and the important role of  
30 precipitation pulse during growing season in assessing the terrestrial ecosystem  
31 carbon balance and cycle.

32  
33 **Key words:** Long-term warming; Precipitation pulse; Soil carbon release;  
34 Response sensitivity; Belowground characteristics; Desert grassland.

35  
36 **1 Introduction**

37 The global carbon (C) cycle is a critical component in the earth's biogeochemical  
38 processes and plays a major role in global warming, which is mainly exacerbated  
39 by the elevated carbon dioxide (CO<sub>2</sub>) concentration in the atmosphere (e.g.,  
40 Falkowski et al. 2000; Carey et al. 2016; Ballantyne et al. 2017; Meyer et al. 2018).  
41 Soil respiration ( $R_s$ ), mainly including the respiration of live roots and

42 microorganisms, is a key component of the ecosystem C cycle as it releases *c.* 80  
43 Pg of C from the pedosphere to the atmosphere annually (Boone et al., 1998; Karhu  
44 et al., 2014; Liu et al., 2016; Ma et al., 2014; Schlesinger, 1977). **The effects of**  
45 **both soil moisture and temperature on  $R_s$  processes and the eco-physiological**  
46 **mechanism are reported extensively; however, it is not well known how soil**  
47 **moisture modulates the response of  $R_s$  to changes in the duration and intensity of**  
48 **warming**, particularly in arid and semiarid areas, where water and nutrients are  
49 both severely limited (e.g., Dacal et al., 2019; Fa et al., 2018; Reynolds et al., 2015;  
50 Ru et al., 2018).

51 The desert steppe **of China** is *c.* 8.8 million  $\text{hm}^2$ , accounting for 22.6% of all  
52 grasslands in China, and is located in both arid and semiarid areas. More than 50%  
53 of the total area of the steppe is facing severe degradation in terms of the decline  
54 of community productivity and soil nutrient depletion, primarily due to improper  
55 land use, such as over-grazing and adverse climatic changes, including heat waves  
56 and drought stresses (Bao et al., 2010; Kang et al., 2007). Global surface  
57 temperature—mainly caused by the anthropogenic  $\text{CO}_2$  increase—is expected to  
58 increase from 2.6 to 4.8°C by the end of this century (IPCC 2014). Moreover, **the**  
59 **desert steppe ecosystem with low vegetation productivity is vulnerable to its harsh**  
60 **environmental conditions, such as scarce precipitation and barren soil nutrition.**  
61 **For instance, water deficit and heat waves during growing season can markedly**  
62 **decrease plant cover and productivity in this arid ecosystem** (Hou et al., 2013; Luo  
63 et al., 2018; Maestre et al., 2012; Yu et al., 2018).

64 Numerous studies have shown that soil temperature and moisture are the two  
65 crucial factors that mainly control  $R_s$ ; **however, it is not well known how soil**  
66 **moisture modulates the response of  $R_s$  to changes in the duration and intensity of**  
67 **warming**. Soil temperature is the primary factor driving temporal  $R_s$  variations (e.g.,  
68 Carey et al., 2016; Gaumont-Guay et al., 2006; Li et al., 2008; Wan et al. 2005).  
69 Generally,  $R_s$  is significantly and positively correlated with soil temperature when  
70 soil moisture is ample (Curiel et al., 2003; Jia et al., 2006; Lin et al., 2011;  
71 Reynolds et al., 2015; Yan et al., 2013). In general, the seasonal variations of  $R_s$   
72 coincide with the seasonal patterns of soil temperature (Keith et al., 1997; Lin et  
73 al., 2011; Wan et al., 2007). For instance, Lin et al. (2011) reported that 63 to 83%  
74 of seasonal variations of  $R_s$  are dominantly controlled by soil temperature. Diurnal  
75  $R_s$  variations are highly associated with variations in soil temperature (Drewitt et  
76 al., 2002; Jia et al., 2006; Song et al., 2015). Soil respiration, according to previous  
77 studies, is expected to increase with soil water content (SWC) (e.g., Chen et al.,  
78 2008; Song et al., 2015; Wan et al., 2007; Yan et al., 2013). However, when the  
79 SWC exceeds the optimal point to reach saturated levels,  $R_s$  decreases (Huxman et  
80 al., 2004; Kwon et al., 2019; Moyano et al., 2012; Moyano et al., 2013; Wang et  
81 al., 2014; **Yan et al., 2018**). In a study conducted in a tall grass prairie, water  
82 addition dramatically increased soil  $\text{CO}_2$  efflux (Liu et al., 2002). Liu et al. (2009)

83 showed a significant  $R_s$  increase after a precipitation pulse in a typical temperate  
84 steppe. Therefore, in arid and semiarid regions, where soil water is limited, the  
85 SWC may control  $R_s$ , and regulate the warming effect (Chen et al., 2008; Curiel et  
86 al., 2003; Shen et al., 2015). Furthermore, the effect of watering pulses depends on  
87 the pulse size, antecedent soil moisture conditions, soil texture and plant cover  
88 (Cable et al., 2008; Chen et al., 2008; Shen et al., 2015; Hoover et al., 2016). **For**  
89 **instance, the results by Huxman et al. (2004) showed that different precipitation**  
90 **pulses have different effects on carbon fluxes in these arid and semiarid regions;**  
91 **and Sponseller (2007) indicated that CO<sub>2</sub> efflux increases with storm size in a**  
92 **Sonoran Desert ecosystem.**

93 A previous study reported the effects of relatively short-term (two-year)  
94 warming (2°C) on soil respiration (Liu et al., 2016). However, there is limited  
95 information about the long-term (four-year) warming effects on  $R_s$  and the  
96 underlying mechanism. **In this current study, we expect that the long-term (four-**  
97 **year) warming have different effects on  $R_s$  (i.e., more profound, even reverse**  
98 **effects relative to previous two-year short term); and the underlying mechanism**  
99 **under longer term warming condition, and the role of soil water status to  $R_s$**   
100 **responses to climatic warming are also uncertain.** Thus, in the present study, we  
101 used a randomized block design with three treatments: control (no warming, no  
102 watering), long-term moderate warming (four years extending from 2011 to 2014,  
103 about 3°C), and short-term acute warming (one year in 2014, about 4°C). Moreover,  
104 a watering pulse treatment (a full irrigation to reach field capacity) was also  
105 established. We present the following hypotheses: **(i) both long- and short-term**  
106 **climatic warming can reduce soil CO<sub>2</sub> efflux, in which soil moisture play a key**  
107 **factor controlling  $R_s$  in the arid ecosystem; and (ii) the dynamics of  $R_s$  in the water-**  
108 **limited ecosystem can be driven mainly by the combination of soil temperature**  
109 **and soil moisture, and soil moisture can modulate the response of  $R_s$  to warming.**

110

## 111 **2 Methods and Materials**

### 112 **2.1 Experimental site**

113 The experiment was conducted in a desert steppe about 13.5 km from Bailingmiao  
114 in Damao County (110°19'53.3"E, 41°38'38.3"N; 1409 m above sea level),  
115 situated in Nei Mongol, Northern China. This area is characterized by a typical  
116 continental climate. The mean annual temperature of this area was 4.3°C with a  
117 minimum of -39.4°C and a maximum of 38.1°C from 1955 to 2014. The mean  
118 annual precipitation is 256.4 mm and approximately 70% of the annual  
119 precipitation is distributed in the growth season period occurring from June to  
120 August (Supplementary Figure S1). According to Chinese classification, the soil  
121 type is called "chestnut" (Calcic Kastanozems in the FAO soil classification) with  
122 a bulk density of 1.23 g·cm<sup>-3</sup> and a pH of 7.4. The area has not been grazed since  
123 1980; the dominant species is *Stipa tianschanica* var. *klemenzi*, accompanied by

124 *Cleistogenes squarrosa*, *Neopallasia pectinata*, *Erodium stephanianum* and  
125 *Artemisia capillaris* (e.g., Hou et al., 2013).

126

## 127 **2.2 Experimental design**

128 The warming experiment used a randomized block design that included three  
129 treatments: **control, long-term moderate warming, short-term acute warming**. The  
130 long-term moderate warming plots were exposed to long-term warming from early  
131 June to late August (the growing season) for four years (2011–2014), while short-  
132 term acute warming were manipulated only during the growing season (June to  
133 August) in 2014. Watering pulse treatments were conducted in August in 2014 and  
134 2017. The control plots received no additional treatments of either temperature or  
135 water (they were recognized as warming or watering control treatments). All of the  
136 warmed plots were heated 24 h/day **by infrared (IR) lamps (1.0 m long)** (GHT220-  
137 800; Sanyuan Huahui Electric Light Source Co. Ltd., Beijing, China) at 800 W  
138 during growing seasons in the experimental years (2011–2014). The IR lamp  
139 heights above the ground were 1.5 m and 1.0 m in moderately and acutely warmed  
140 plots, respectively. The watering pulse plots were fully irrigated to field capacity  
141 to simulate a watering pulse on August 19, 2014, and August 14, 2017. For the  
142 field warming facility, to simulate the shading effects, the control plots were  
143 designed to install a “dummy” heater similar to those used for the warmed plots.  
144 There were a total of 15 experimental plots (2 m × 2 m) arranged in a 3 × 5 matrix  
145 with each treatment randomly replicated once in each block across three  
146 experimental blocks; a 1 m buffer for each adjacent plot was made.

147

## 148 **2.3 Soil temperature and moisture**

149 At the center of each plot, a thermocouple (HOBO S-TMB-M006; Onset Computer  
150 Corporation, Bourne, MA, USA) was installed at a depth of 5 cm to measure the  
151 soil temperature, and a humidity transducer (HOBO S-SMA-M005; Onset  
152 Computer Corporation, Bourne, MA, USA) was installed at a depth of 0 to 20 cm  
153 to monitor the soil moisture (v/v). Continuous half-hour measurements were  
154 recorded by an automatic data logger (HOBO H21-002; Onset Computer  
155 Corporation, Bourne, MA, USA).

156

## 157 **2.4 Soil respiration**

158 The soil respiration was measured with a Li-8100 soil CO<sub>2</sub> Flux System (LI-COR  
159 Inc., Lincoln, NE, USA) with the R<sub>s</sub> chamber mounted on polyvinyl chloride (PVC)  
160 collars. Fifteen PVC collars (10 cm inside diameter, 5 cm in height) were inserted  
161 into the soil 2 to 3 cm below the surface. They were randomly placed into the soil  
162 in each plot after clipping all plants growing in the collar placement areas. The  
163 collars were initially placed a day before measurements were begun to minimize  
164 the influence of soil surface disturbance and root injury on R<sub>s</sub> (Bao et al., 2010;

165 Wan et al., 2005). Respirations for the control and all of the warmed plots were  
166 measured from 6:00 a.m. to 6:00 p.m. on July 7 and 8 and August 18, 19, 20 and  
167 21, 2014. The  $R_s$  for watering pulse treatment was measured after the water  
168 additions on August 19, 2014, and August 14, 15, 16 and 17, 2017. To stabilize the  
169 measurement,  $R_s$  was measured only on the selected typical days (i.e., mildly windy,  
170 sunny days). The  $R_s$  in all plots was measured once every 2 h on that day and each  
171 measurement cycle was finished within 30 min to minimize the effects of  
172 environmental variables, such as temperature and light. Thus, a total of six  
173 measurement cycles was completed each day. The **soil water content** (SWC, (0–20  
174 cm soil depth) in watering plots was measured using the Field Scout TDR 300 Soil  
175 Moisture Meter (Spectrum Technologies, Inc., Aurora, IL, USA).

176

## 177 **2.5 Belowground biomass and related soil characteristics**

178 Soil samples of 0 to 10 cm in depth were taken from each collar after the  $R_s$   
179 measurements and then passed through a 1 mm sieve to separate the roots. The  
180 roots were washed and oven-dried at 70°C for 48 h to a constant weight and then  
181 weighed. Subsamples of each soil sample were separated to determine the  
182 gravimetric water content and soil chemical properties. Briefly, to determine the  
183 soil organic C (SOC) content, we mixed a 0.5 g soil sample, 5 ml of concentrated  
184 sulfuric acid (18.4 mol L<sup>-1</sup>), and 5.0 ml of aqueous potassium dichromate (K<sub>2</sub>Cr<sub>2</sub>O<sub>7</sub>)  
185 (0.8 mol L<sup>-1</sup>) in a 100 ml test tube, then heated them in a paraffin oil pan at 190°C,  
186 keeping them boiling for 5 minutes. After cooling, the 3 drops of phenanthroline  
187 indicator were added and then the sample was titrated with ferrous ammonium  
188 sulphate (0.2 mol L<sup>-1</sup>) until the color of the solution changed from brown to purple  
189 to dark green (Nelson and Sommers, 1982; Chen et al. 2008; Edwards et al. 2013).  
190 The soil ammonium-nitrogen (N) (NH<sub>4</sub><sup>+</sup>-N) concentration and the nitrate-N (NO<sub>3</sub><sup>-</sup>  
191 -N) concentration were extracted with a potassium chloride (KCl) solution and  
192 measured using a flow injection analyzer (SEAL Auto Analyzer 3; SEAL  
193 Analytical, Inc., Mequon, WI, USA) (Liu et al. 2014). Soil samples (0–10 cm in  
194 depth) from each collar were oven-dried at 105°C for at least 48 h and weighed to  
195 determine the SWC. The soil microbial biomass C (MBC) and microbial biomass  
196 N (MBN) were measured using the chloroform-fumigation extraction method and  
197 calculated by subtracting extractable C and N contents in the unfumigated samples  
198 from those in the fumigated samples (Liu et al., 2014; Rinnan et al., 2009). All  
199 extracts were stored at 4°C until further testing commenced.

200

## 201 **2.6 Statistical analysis**

202 All statistical analyses were performed using IBM SPSS Statistics 21.0 (IBM,  
203 Armonk, NY, USA). All the data were normal as tested by the Shapiro-Wilk  
204 method. A one-way analysis of variation (ANOVA) with LSD multiple range tests  
205 **was** conducted to test the statistical significance of the differences in the mean

206 values of the soil temperature, soil moisture,  $R_s$ , belowground biomass, SOC,  
 207  $\text{NH}_4^+$ -N and  $\text{NO}_3^-$ -N concentrations, and MBC and MBN concentrations at depths  
 208 of 0 to 10 cm among the different treatments. A linear regression analysis was also  
 209 used to test the relationship between the SWC and  $R_s$ . The relationship between  $R_s$   
 210 and the soil temperature in each treatment was tested with an exponential function.

211 We used  $Q_{10}$  to express the temperature sensitivity of  $R_s$  and calculated it  
 212 according to the following equations:

213

$$214 \quad R_s = a e^{bT_s} \quad (1)$$

$$215 \quad Q_{10} = e^{10b} \quad (2)$$

216

217 Here,  $T_s$  is the soil temperature,  $a$  refers to the intercept of  $R_s$  when the soil  
 218 temperature is  $0^\circ\text{C}$ , and  $b$  is the temperature coefficient reflecting the temperature  
 219 sensitivity of  $R_s$  and is used to calculate  $Q_{10}$  (Lloyd and Taylor, 1994; Luo et al.,  
 220 2001; Shen et al., 2015).

221 The relationship between  $R_s$  and the SWC was further conducted to fit the  
 222 Gompertz function, a sigmoid function (Gompertz, 1825; Yin et al., 2003), which  
 223 could express that the linear increase is rapid followed by a leveling off:

224

$$225 \quad R_s = a * e^{-b * (\exp(-k * \text{SWC}))} \quad (3)$$

226

227 Here,  $a$  is an asymptote; the SWC halfway point of  $a/2$  equals  $-\ln(\ln(2)/b)/c$ . The  
 228 turning point of the maximum rate of  $R_s$  increase equals  $ak/e$  when the SWC equals  
 229  $\ln(b)/k$ . Thus, the thresholds of the changes in  $R_s$  with increasing SWC can be  
 230 obtained from the Gompertz function (Gompertz, 1825; Yin et al., 2003).

231 A non-linear regression model was used to fit the relationship of  $R_s$  with both  
 232 soil temperature and soil moisture (Savage et al., 2009):

233

$$234 \quad R_s = (R_{\text{ref}} * Q_{10}^{(T_s-10)/10}) * \beta^{(\text{SWC}_{\text{OPT}} - \text{SWC})^2} \quad (4)$$

235

236

237 where  $T_s$  is the soil temperature at a soil depth of 5 cm,  $R_{\text{ref}}$  is  $R_s$  at  $10^\circ\text{C}$  and  $Q_{10}$   
 238 is a unitless expression in  $R_s$  for each increase in  $10^\circ\text{C}$ . SWC is water content in 0  
 239 to 20 cm soil depth,  $\text{SWC}_{\text{OPT}}$  is the optimal water content and  $\beta$  is a parameter  
 240 modifying the shape of the quadratic fit.

241 Following the key factors selected by the stepwise regression method, a path  
 242 analysis was used to examine the primary components directly and indirectly  
 243 affecting  $R_s$  by integrating both the stepwise linear regression module and Pearson  
 244 correlation analyses (Gefen et al., 2000). The statistical significances were set at  $P$   
 245  $< 0.05$  for all tests, unless otherwise indicated.



246

## 247 **3 Results**

### 248 **3.1 Warming effects on belowground characteristics**

249 The soil temperatures at a soil depth of 5 cm in the warmed plots were much higher  
250 than those in the control plots (Figure 1). During growing season, the mean soil  
251 temperatures in the control, the moderately and acutely warmed plots were **21.9°C**  
252 **(±0.13 SE), 24.5°C (±0.15), and 25.0°C (±0.18)**, respectively. The moderately and  
253 acutely warmed plots were respectively increased by 2.6°C ( $P < 0.001$ ) and 3.1°C  
254 ( $P < 0.001$ ) compared to those in the control plots. The SWC in the moderately and  
255 acutely warmed plots (0–20 cm soil profile, **defined as ratios of water volume and**  
256 **soil volume**) were significantly reduced ( $P < 0.001$ ) compared to those in the  
257 control plots (Figure 1), indicating that warming led to marked declines in the SWC,  
258 consequently enhancing drought stress. On August 18, 19, 20 and 21, which were  
259 the dates that we measured  $R_s$ , the daily soil temperatures in the moderately and  
260 acutely warmed plots were around 3°C and 4°C higher than those in the control  
261 plots, respectively. All belowground variables (belowground biomass, soil N and  
262 microbial characteristics) were not significantly altered by warming regimes at the  
263 site of this experiment (Supplementary Table S1;  $P > 0.05$ ). However, the organic  
264 soil carbon content tended to decrease with long-term climatic warming.

265

### 266 **3.2 Watering pulse effects on $R_s$**

267 **The  $R_s$  significant increased with SWC both linearly ( $R^2 = 0.83$ ;  $P < 0.01$ ) and**  
268 **quadratically ( $R^2 = 0.88$ ;  $P < 0.01$ , Figure 2A).** Moreover, the Gompertz function  
269 was well fitted to their relationship ( $R^2 = 0.87$ ; RMSE = 4.88) (Figure 2B). From  
270 the Gompertz functional curve, the  $R_s$  asymptote value, as an estimated maximum,  
271 was  $3.76 \mu \cdot \text{mol} \cdot \text{m}^{-2} \cdot \text{s}^{-1}$  when the optimal SWC was 22.85%. In the watering plots,  
272 an exponential function was well fitted to the relationship between soil respiration  
273 and the soil temperatures ( $R^2 = 0.31$ ;  $P < 0.01$ ), with a temperature sensitivity ( $Q_{10}$ )  
274 of 1.69. However, the exponential function was not well fitted in the control plots  
275 (Figure 3A).

276

### 277 **3.3 Effects of warming regimes on $R_s$**

278 **Warming regimes resulted in marked declines in  $R_s$ . Whereas no difference in  $R_s$**   
279 **was observed in July, during August average  $R_s$  values were 1.57, 1.06, and 0.93**  
280  **$\mu \cdot \text{mol} \cdot \text{m}^{-2} \cdot \text{s}^{-1}$  in the control, moderately warmed and acutely warmed plots,**  
281 **respectively,** indicating that warming regimes resulted in marked declines (Figure  
282 4). Changes in  $R_s$  differed significantly between the control and both warmed plots  
283 ( $P < 0.01$ ), while the  $R_s$  in the two warmed plots did not significantly differ ( $P =$   
284  $0.45$ ). The relationships between the  $R_s$  and soil temperature of each treatment were  
285 well fitted by the exponential equations ( $P < 0.05$ ) (Figure 3B). The  $Q_{10}$  values  
286 were 1.88, 2.12 and 1.58 in the temperature controlled, moderate and acute

287 warming treatments, respectively (Figure 3B). It indicated that  $R_s$  increases  
288 exponentially with temperature in watered plots but was lower and insensitive to  
289 temperature in the control plots (Figure 3); and that long-term warming rather than  
290 temporary high temperature reduced  $R_s$ , despite having a positive relationship with  
291 soil temperature (Figure 3, 4).

### 293 3.4 Interactive effects on $R_s$ from soil temperature and soil water content

294 Across all watering and warming treatments, generally, a high temperature led to  
295 an increase in  $R_s$  under ample soil moisture, whereas  $R_s$  was limited under a soil  
296 water deficit. As shown in Figure 5, A non-linear regression model (equation 4)  
297 was well fitted to the relationship of  $R_s$  with both soil temperature and soil moisture  
298 in the control plots ( $R^2 = 0.40$ ,  $RMSE = 0.60$ ). Based on the function  $R_s =$   
299  $(0.733 * 1.796^{(T_s-10)/10}) * \beta^{(0.229-SWC)^2}$ , the key parameters were obtained:  $R_{ref}$ , a  $R_s$  at  
300  $10^\circ\text{C}$ , was  $0.73 \mu \cdot \text{mol} \cdot \text{m}^{-2} \cdot \text{s}^{-1}$ ;  $Q_{10}$ , a unitless expression in  $R_s$  for each increase in  
301  $10^\circ\text{C}$ , was 1.80; and  $\beta$ , a parameter modifying the shape of the quadratic fit, was  
302 0.001 (Figure 5).

### 304 3.5 Effects of multiple factors on $R_s$ : a path analysis

305 Based on a stepwise regression analysis of the relationships between the  $R_s$  and  
306 multiple factors, four key factors were screened: soil temperature, soil moisture,  
307 belowground biomass and SOC. Their effects on  $R_s$  were further determined by a  
308 path analysis. The results showed that soil moisture and soil temperature were two  
309 major direct factors controlling  $R_s$  (the two direct path coefficients were 0.72 and  
310 0.55, respectively). SOC had the highest indirect effect on  $R_s$  (the indirect path  
311 coefficient was 0.57). Soil moisture highly correlated with  $R_s$  ( $R = 0.78$ ,  $P < 0.01$ ;  
312 Supplementary Table S2, Figure 6), indicating again that the soil water status may  
313 impose the greatest effect on the carbon release from soil in the desert grassland.

## 315 4. Discussion

### 316 4.1 Warming effects on $R_s$

317 Previous studies have shown positive  $R_s$  responses to increased soil temperatures  
318 below a critical high temperature (e.g., Carey et al., 2016; Drewitt et al., 2002;  
319 Gaumont-Guay et al., 2006; Meyer et al., 2018). However, in the current study site,  
320 the climatic warming finally reduced the  $R_s$  by 32.5% and 40.8% under long-term  
321 versus short-term climatic warming conditions in the desert dryland, respectively,  
322 which chiefly confirmed our first hypothesis. In a semiarid grassland on the Loess  
323 Plateau of China, the total  $R_s$  was also constrained substantially by a field  
324 manipulative experiment (Fang et al., 2018). This result may have been caused by  
325 the following factors. First, high temperatures may cause thermal stress on  
326 microbes and subsequently reduce microbial respiration (Chang et al., 2012; Dacal  
327 et al., 2019). For instance, in an alpine steppe on the Tibetan Plateau, microbial



328 respiration was significantly reduced when the temperature rose to 30°C (Chang et  
329 al., 2012). Second, in the desert grassland, where water is often limited, the SWC  
330 becomes the primary factor affecting  $R_s$  (Supplementary Table S2; Figure 6), while  
331 warming can cause greater evapotranspiration, consequently lessening soil  
332 moisture (Figure 1), and finally reducing  $R_s$  (Munson et al., 2009; Wan et al., 2007;  
333 Yan et al., 2013). Third,  $R_s$  may acclimatize to warming at high temperatures **at an**  
334 **ample soil moisture; whereas it decreases under water deficit (Moyano et al., 2013;**  
335 **Wang et al., 2014)**; however, root activities and plant growth can decrease with  
336 increasing temperatures above an optimum level, which indirectly reduces  $R_s$   
337 (Carey et al., 2017; Liu et al., 2016; Luo et al., 2001; Wan et al., 2007).  
338 Nevertheless, the drastic declines in  $R_s$  under both long-term and short-term  
339 climatic warming regimes in the desert dryland ecosystem may be driven by  
340 multiple factors, including the ecosystem type, time and soil features (Liu et al.,  
341 2016; Wan et al., 2007; Meyer et al., 2018; Thakur et al., 2019).

342

#### 343 **4.2 Interactive effect of soil water status and temperature**

344 As stated above, in an arid ecosystem, soil water deficit is a primary factor  
345 inhibiting soil carbon release (Supplementary Table S2; Figure 6; Liu et al., 2016;  
346 Munson et al., 2009; Yan et al., 2013). Thus,  $R_s$  increases with increasing soil  
347 moisture. However, it could be leveled off or decreased when soil moisture exceeds  
348 an optimal level for the soil carbon release (Huxman et al., 2004; Moyano et al.,  
349 2013; Wang et al., 2014). Thus, the relationship between  $R_s$  and SWC may be well  
350 fitted to the **Gompertz functional curve model (Gompertz, 1825; Yin et al., 2003)**,  
351 which can be confirmed by the present results in the native arid desert ecosystem  
352 (Figure 2). As indicated by Tucker and Reed (2016), soil water deficit can shrink  
353 the  $R_s$  itself and its response to temperature, suggesting the changes in  $R_s$  may be  
354 determined simultaneously by both soil temperature and water status (Janssens et  
355 al., 2001; Yan et al., 2013; Sierra et al., 2015). Moreover, in the present experiment,  
356 the interactive effects of both factors were tested based on the relationship of  $R_s$   
357 with both soil temperature and soil moisture in a non-linear regression model  
358 (Savage et al., 2009). The model utilized was well fitted but marginally so ( $R^2 =$   
359 **0.40**, RMSE = 0.596; Figure 5), indicating that both the soil temperature and soil  
360 water content coordinated the changes in  $R_s$ . However, this interaction may also be  
361 affected simultaneously by other abiotic and biotic factors, such as soil nutrition  
362 availability and soil microbe activity (e.g., Camenzind et al., 2018; Karhu et al.,  
363 2014; Thakur et al., 2019; Zhang et al., 2014).

364

#### 365 **4.3 Key factors and the influence path**

366 As noted above,  $R_s$  is affected by several abiotic and biotic factors. The current  
367 results showed that soil moisture and soil temperature were two major direct  
368 factors, and SOC only was an indirect factor controlling  $R_s$  (Supplementary Table

369 S2, Figure 6). Importantly, soil moisture, with both the highest direct path  
370 coefficients (0.7) and correlation coefficient (0.8) for  $R_s$ , may become the most  
371 important factor affecting  $R_s$  in this desert steppe. These findings agree with the  
372 previous results: The soil water status had a significantly positive effect on  $R_s$  (e.g.,  
373 Chen et al., 2008; Liu et al., 2016; Xu et al., 2016). Furthermore, the soil moisture  
374 condition can mediate the relationship between soil temperature and  $R_s$ , thus  
375 affecting its temperature sensitivity; it becomes the main key factor controlling  
376  $R_s$ , especially in arid ecosystems, such as desert steppes, where the available soil  
377 water is limited (Conant et al., 2000; Curiel et al., 2003; Fa et al., 2018; Jassal et  
378 al., 2008; Roby et al., 2019). Thus, under both the long-term and short-term  
379 climatic warming regimes, the changes in  $R_s$  might be driven by both soil  
380 temperature and soil moisture as two key factors, and SOC as an indirect factor  
381 and soil feature, thus mostly confirming our second hypothesis. This finding may  
382 provide new insight into how to control soil carbon release in arid ecosystems.

383

#### 384 **4.4 Warming effects on the variables belowground**

385 Elevated temperature has been shown to increase or decrease root productivity and  
386 biomass, depending on experimental sites and vegetation types (Bai et al., 2010;  
387 Fan et al., 2009; Litton and Giardina, 2008; Wan et al., 2004). The decreased  
388 availability of soil nutrients apparently limits root growth, finally inducing root  
389 mortality and weakening responses to the elevated temperature (Eissenstat et al.,  
390 2000; Johnson et al., 2006; Wan et al., 2004; Zhang et al., 2014). In our experiment,  
391 no significantly different changes occurred in either soil  $\text{NH}_4^+$ -N or  $\text{NO}_3^-$ -N  
392 concentrations among the three treatments (Supplementary Table S1), and these  
393 might be linked to the non-significant response of belowground biomass to  
394 increasing temperature. Microbial biomass and its activities in soil depend on the  
395 root biomass, SWC and soil N conditions (Liu et al., 2014; Rinnan et al., 2007;  
396 Zhang et al., 2008; Zhang et al., 2014). Warming regimes had no significant effects  
397 on either MBC or MBN in the current study (Supplementary Table S1), which  
398 might be due to the lack of any difference in the changes in basic soil nutrition  
399 status, such as the N conditions, among the three warming treatments. This result  
400 is consistent with that of Zhang et al. (2005) and Liu et al. (2015). Moreover, in  
401 the present study, SOC concentrations were not significantly affected by climatic  
402 warming (Supplementary Table S1), which is inconsistent with the findings of  
403 previous studies (Jobbágy and Jackson, 2000; Prietzel et al., 2016). However, there  
404 was a decreasing trend evident with long-term warming. Crowther et al. (2016)  
405 reported a loss of approximately  $30 \pm 30$  Pg of C in the upper soil horizons at  $1^\circ\text{C}$   
406 warming in global soil C stocks and projected a loss of  $203 \pm 161$  Pg of C under  
407  $1^\circ\text{C}$  of warming over 35 years. The C losses from soil moving into the atmosphere  
408 may result in positive feedback regarding global warming (Bradford et al., 2016;  
409 Dacal et al., 2019; Jenkinson et al., 1991; Liu et al., 2016). However, SOC exerted

410 an indirect effect via a path analysis (Figure 6). For this difference, therefore, more  
411 evidence needs to be provided to address the issue.

412 In conclusion, we determined the responses of  $R_s$  to field experimental long-  
413 term versus short-term climatic warming and watering pulses in a desert steppe  
414 ecosystem. We found the following: i) both long- and short-term warming  
415 significantly reduced  $R_s$  during the peak growth season; ii) soil moisture was the  
416 main factor controlling  $R_s$  in desert grassland; iii)  $R_s$  was significantly and  
417 exponentially increased with soil temperature, with an interactive effect with soil  
418 moisture; and iv) belowground biomass, soil nutrition variables and soil microbial  
419 characteristics showed no significant changes after either long-term or short-term  
420 climatic warming. These findings may be critical to predict soil CO<sub>2</sub> fluxes  
421 and optimize C management work in arid and semiarid regions under the changing  
422 climate. However, the patterns of the changes in soil C fluxes and the underlying  
423 mechanism in response to climatic change are markedly complicated at various  
424 spatial-temporal scales during growing season—from site and regional to global  
425 scales, and from daily, seasonal and yearly to decade scales—and still need to be  
426 investigated further (e.g., Ballantyne et al., 2017; Dacal et al., 2019; ; Meyer et al.,  
427 2018; Romero-Olivares et al., 2017).

428

429 **Data availability.** Currently, data can only be accessed in the form of Excel  
430 spreadsheets via the corresponding author.

431

432 **Supplement.** The supplement related to this article is available online at:

433

434 **Author contributions.** ZX and GZ conceived and designed this study. HY, ZX and  
435 YS conducted this experiment and analysed the data. All authors wrote and  
436 proofread this manuscript.

437

438 **Competing interests.** The authors declare that they have no conflict of interest.

439

440 **Acknowledgements.** This research was jointly funded by National Natural  
441 Science Foundation of China (31661143028, 41775108), and the Special Fund for  
442 Meteorological Scientific Research in the Public Interest (GYHY201506001-3).  
443 We greatly thank Feng Zhang, Bingrui Jia, Hui Wang, Minzheng Wang, He Song  
444 for their loyal help during the present study.

445

## 446 **References**

447 Bai, W., Wan, S., Niu, S., Liu, W., Chen, Q., Wang, Q., Zhang, W., Han, X., and Li, L.:  
448 Increased temperature and precipitation interact to affect root production, mortality, and  
449 turnover in a temperate steppe: implications for ecosystem C cycling. *Glob. Change Biol.*,  
450 16, 1306–1316, <https://doi.org/10.1111/j.1365-2486.2009.02019.x>, 2010.

- 451 Ballantyne, A., Smith, W., Anderegg, W., Kauppi, P., Sarmiento, J., Tans, P., Shevliakova, E.,  
452 Pan, Y., Poulter, B., Anav, A., and Friedlingstein, P.: Accelerating net terrestrial carbon  
453 uptake during the warming hiatus due to reduced respiration. *Nature Clim. Change*, 7,  
454 148–152, <https://doi.org/10.1038/nclimate3204>, 2017.
- 455 Bao, F., Zhou, G. S., Wang, F. Y., and Sui, X. H.: Partitioning soil respiration in a temperate  
456 desert steppe in Inner Mongolia using exponential regression method. *Soil Biol. Biochem.*,  
457 42, 2339–2341, <https://doi.org/10.1016/j.soilbio.2010.08.033>, 2010.
- 458 Boone, R. D., Nadelhoffer, K. J., Canary, J. D., and Kaye, J. P.: Roots exert a strong influence  
459 on the temperature sensitivity of soil respiration. *Nature*, 396, 570–572,  
460 <https://doi.org/10.1038/25119>, 1998.
- 461 Bradford, M. A., Wieder, W. R., Bonan, G. B., Fierer, N., Raymond, P. A., and Crowther, T.  
462 W.: Managing uncertainty in soil carbon feedbacks to climate change. *Nature Clim.*  
463 *Change*, 6, 751–758, <https://doi.org/10.1038/nclimate3071>, 2016.
- 464 Cable, J. M., Ogle, K., Williams, D. G., Weltzin, J. F., and Huxman, T. E.: Soil texture drives  
465 responses of soil respiration to precipitation pulses in the Sonoran Desert: Implications  
466 for climate change. *Ecosystems*, 11, 961–979, [https://doi.org/10.1007/s10021-008-9172-](https://doi.org/10.1007/s10021-008-9172-x)  
467 [x](https://doi.org/10.1007/s10021-008-9172-x), 2008.
- 468 Camenzind, T., Hättenschwiler, S., Treseder, K. K., Lehmann, A., and Rillig, M. C.: Nutrient  
469 limitation of soil microbial processes in tropical forests. *Ecol., Monogr.*, 88, 4–21,  
470 <https://doi.org/10.1002/ecm.1279>, 2018.
- 471 Carey, J. C., Tang, J., Templer, P. H., Kroeger, K. D., Crowther, T. W., Burton, A. J., Dukes, J.  
472 S., Emmett, B., Frey, S. D., Heskell, M. A., and Jiang, L.: Temperature response of soil  
473 respiration largely unaltered with experimental warming. *P. Natl. Acad. Sci. USA*, 113,  
474 13797–13802, <https://doi.org/10.1073/pnas.1605365113>, 2016.
- 475 Chang, X., Wang, S., Luo, C., Zhang, Z., Duan, J., Zhu, X., Lin, Q., and Xu, B.: Responses of  
476 soil microbial respiration to thermal stress in alpine steppe on the Tibetan plateau. *Euro.*  
477 *J. Soil Sci.*, 63, 325–331, <https://doi.org/10.1111/j.1365-2389.2012.01441.x>, 2012.
- 478 Chen, S. P., Lin, G. H., Huang, J. H., and He, M.: Responses of soil respiration to simulated  
479 precipitation pulses in semiarid steppe under different grazing regimes. *J. Plant Ecol.*, 1,  
480 237–246, <https://doi.org/10.1093/jpe/rtn020>, 2008.
- 481 Crowther, T. W., Todd-Brown, K. E., Rowe, C. W., Wieder, W. R., Carey, J. C., Machmuller,  
482 M. B., Snoek, B. L., Fang, S., Zhou, G., Allison, S. D., and Blair, J. M.: Quantifying  
483 global soil carbon losses in response to warming. *Nature*, 540, 104–108,  
484 <https://doi.org/10.1038/nature20150>, 2016.
- 485 Curiel, J. C., Janssens, I. A., Carrara, A., Meiresonne, L., and Ceulemans, R.: Interactive effects  
486 of temperature and precipitation on soil respiration in a temperate maritime pine  
487 forest. *Tree Physiol.*, 23, 1263–1270, <https://doi.org/10.1093/treephys/23.18.1263>, 2003.
- 488 Conant, R. T., Klopatek, J. M., and Klopatek, C. C.: Environmental factors controlling soil  
489 respiration in three semiarid ecosystems. *Soil Sci. Soc. Am. J.*, 64(1), 383–390,  
490 <https://doi:10.2136/sssaj2000.641383x>, 2000.
- 491 Dacal, M., Bradford, M. A., Plaza, C., Maestre, F. T., and García-Palacios, P.: Soil microbial  
492 respiration adapts to ambient temperature in global drylands. *Nat. Ecol. Evol.*, 3, 232–  
493 238, <https://doi.org/10.1038/s41559-018-0770-5>, 2019.
- 494 Drewitt, G. B., Black, T. A., Nesic, Z., Humphreys, E. R., Jork, E. M., Swanson, R., Ethier, G.  
495 J., Griffis, T., and Morgenstern, K.: Measuring forest floor CO<sub>2</sub> fluxes in a Douglas-fir  
496 forest. *Agric., For. Meteorol.*, 110, 299–317, [https://doi.org/10.1016/S0168-](https://doi.org/10.1016/S0168-1923(01)00294-5)  
497 [1923\(01\)00294-5](https://doi.org/10.1016/S0168-1923(01)00294-5), 2002.

498 Edwards, K. A. and Jfferies, R. L.: Inter-annual and seasonal dynamics of soil microbial  
499 biomass and nutrients in wet and dry low-Arctic sedge meadows. *Soil Biol. Biochem.*, 57,  
500 83–90, <https://doi.org/10.1016/j.soilbio.2012.07.018>, 2013.

501 Eissenstat, D. M, Wells, C. E, Yanai, R. D, and Whitbeck, J. L.: Research view: Building roots  
502 in a changing environment: Implications for root longevity. *New Phytol.*, 147, 33–42.  
503 2000.

504 Fa, K., Zhang, Y., Lei, G., Wu, B., Qin, S., Liu, J., Feng, W., and Lai, Z.: Underestimation of  
505 soil respiration in a desert ecosystem. *Catena*, 162, 23–28,  
506 <https://doi.org/10.1016/j.catena.2017.11.019>, 2018.

507 Fan, J. W., Wang, K., Harris, W., Zhong, H. P., Hu, Z. M., Han, B., Zhang, W. Y., and Wang, J.  
508 B.: Allocation of vegetation biomass across a climate-related gradient in the grasslands  
509 of Inner Mongolia. *J. Arid Environ.*, 73, 521–528,  
510 <https://doi.org/10.1016/j.jaridenv.2008.12.004>, 2009.

511 Falkowski, P., Scholes, R. J., Boyle, E. E. A., Canadell, J., Canfield, D., Elser, J., Gruber, N.,  
512 Hibbard, K., Högberg, P., Linder, S., and Mackenzie, F. T.: The global carbon cycle: a test  
513 of our knowledge of earth as a system. *Science*, 290, 291–296,  
514 <https://doi.org/10.1126/science.290.5490.291>, 2000.

515 Fang, C., Li, F., Pei, J., Ren, J., Gong, Y., Yuan, Z., Ke, W., Zheng, Y., Bai, X., and Ye, J. S.:  
516 Impacts of warming and nitrogen addition on soil autotrophic and heterotrophic  
517 respiration in a semi-arid environment. *Agric. For. Meteorol.*, 248, 449–457,  
518 <https://doi.org/10.1016/j.agrformet.2017.10.032>, 2018.

519 Gaumont-Guay, D., Black, T. A., Griffis, T. J., Barr, A. G., Jassal, R. S., and Nesic, Z.:  
520 Interpreting the dependence of soil respiration on soil temperature and water content in a  
521 boreal aspen stand. *Agric. For. Meteorol.*, 140, 220–235,  
522 <https://doi.org/10.1016/j.agrformet.2006.08.003>, 2006.

523 Gefen, D., Straub, D., and Boudreau, M. C.: Structural equation modeling and regression:  
524 Guidelines for research practice. *Communications of the Association for Information*  
525 *Systems*, 4: 7. <http://doi.org/10.17705/1CAIS.00407>, 2000.

526 Gompertz, B.: On the nature of the function expressive of the law of human mortality, and on  
527 a new mode of determining the value of life contingencies. *Philos. TR. Soc. London*, 115,  
528 513–583, <https://doi.org/10.1098/rstl.1825.0026>, 1825.

529 Han, G. X., Zhou, G. S., Xu, Z. Z., Yang, Y., Liu, J. L., and Shi, K.Q.: Soil temperature and  
530 biotic factors drive the seasonal variation of soil respiration in a maize (*Zea mays* L.)  
531 agricultural ecosystem. *Plant Soil*, 291, 15–26, [https://doi.org/10.1007/s11104-006-9170-](https://doi.org/10.1007/s11104-006-9170-8)  
532 [8](https://doi.org/10.1007/s11104-006-9170-8), 2006.

533 Hoover, D. L., Knapp, A. K., and Smith, M. D.: The immediate and prolonged effects of  
534 climate extremes on soil respiration in a mesic grassland. *J. Geophys. Res.-Biogeosci.*,  
535 121, 1034–1044, <http://dx.doi.org/10.1002/2015JG003256>, 2016.

536 Hou, Y. H., Zhou, G. S., Xu, Z. Z., Liu, T., and Zhang, X. S.: Interactive effects of warming  
537 and increased precipitation on community structure and composition in an annual forb  
538 dominated desert steppe. *PLoS one*, 8, e70114.  
539 <http://dx.doi.org/10.1371/journal.pone.0070114>, 2013.

540 Huxman, T. E., Snyder, K. A., Tissue, D., Leffler, A. J., Ogle, K., Pockman, W. T., Sandquist,  
541 D. R., Potts, D. L., and Schwinning, S.: Precipitation pulses and carbon fluxes in semiarid

542 and arid ecosystems. *Oecologia*, 141, 254-268, <http://dx.doi.org/10.1007/s00442-004->  
543 1682-4, 2004.

544 IPCC. 2014. Climate Change 2014: Synthesis Report. Contribution of Working Groups I, II  
545 and III to the Fifth Assessment Report of the Intergovernmental Panel on Climate Change  
546 [Core Writing Team, Pachauri RK, Meyer LA (eds.)]. IPCC, Geneva, Switzerland, pp151.

547 Jassal, R. S., Black, T. A., Novak, M. D., Gaumont-Guay, D., and Nesic, Z.: Effect of soil water  
548 stress on soil respiration and its temperature sensitivity in an 18-year-old temperate  
549 Douglas-fir stand. *Glob. Change Biol.*, 14, 1-14, <http://dx.doi.org/10.1111/j.1365->  
550 2486.2008.01573.x, 2008.

551 Jenkinson, D. S., Adams, D. E., and Wild, A.: Model estimates of CO<sub>2</sub> emissions from soil in  
552 response to global warming. *Nature*, 351, 304-306, <http://dx.doi.org/10.1038/351304a0>,  
553 1991.

554 Jia, B., Zhou, G., Wang, Y., Wang, F., and Wang, X.: Effects of temperature and soil water-  
555 content on soil respiration of grazed and ungrazed *Leymus chinensis* steppes, Inner  
556 Mongolia. *J. Arid Environ.*, 67, 60-76, <http://dx.doi.org/10.1016/j.jaridenv.2006.02.002>,  
557 2006.

558 Janssens, I. A., Kowalski, A. S., and Ceulemans. R.: Forest floor CO<sub>2</sub> fluxes estimated by eddy  
559 covariance and chamber-based model. *Agric. For. Meteorol.* 106: 61-69,  
560 [http://dx.doi.org/10.1016/S0168-1923\(00\)00177-5](http://dx.doi.org/10.1016/S0168-1923(00)00177-5), 2001.

561 Johnson, M. G., Rygielwicz, P. T., Tingey, D. T., and Phillips, D. L.: Elevated CO<sub>2</sub> and elevated  
562 temperature have no effect on Douglas-fir fine-root dynamics in nitrogen-poor soil. *New*  
563 *Phytol.*, 170, 345-356, <http://dx.doi.org/10.1111/j.1469-8137.2006.01658.x>, 2006.

564 Jobbágy, E. G. and Jackson, R. B.: The vertical distribution of soil organic carbon and its  
565 relation to climate and vegetation. *Ecol. Appl.*, 10, 423-436,  
566 [https://doi.org/10.1890/1051-0761\(2000\)010\[0423:TVDOSO\]2.0.CO;2](https://doi.org/10.1890/1051-0761(2000)010[0423:TVDOSO]2.0.CO;2), 2000.

567 Kang, L., Han, X. G., Zhang, Z. B., and Sun, O. J.: Grassland ecosystems in China: review of  
568 current knowledge and research advancement. *Philos. T. R. Soc. B*, 362, 997-1008,  
569 <http://dx.doi.org/10.1098/rstb.2007.2029>, 2007.

570 Karhu, K., Auffret, M. D., Dungait, J. A., Hopkins, D. W., Prosser, J. I., Singh, B. K., Subke,  
571 J. A., Wookey, P. A., Agren, G. I., Sebastia, M. T., Gouriveau, F., Bergkvist, G., Meir, P.,  
572 Nottingham, A. T., Salinas, N., and Hartley, I. P.: Temperature sensitivity of soil  
573 respiration rates enhanced by microbial community response. *Nature*, 513, 81-84,  
574 <http://dx.doi.org/10.1038/nature13604>, 2014.

575 Keith, H., Jacobsen, K. L., and Raison, R. J., Effects of soil phosphorus availability,  
576 temperature and moisture on soil respiration in *Eucalyptus pauciflora* forest. *Plant*  
577 *Soil*, 190, 127-141, <https://doi.org/10.1023/A:1004279300622>, 1997.

578 Kwon, M. J., Natali, S. M., Hicks, C. E., Schuur, E. A., Steinhof, A., Crummer, K. G., Zimov,



579 N., Zimov, S. A., Heimann, M., and Kolle, O.: Mathias Göckedel Drainage enhances  
580 modern soil carbon contribution but reduces old soil carbon contribution to ecosystem  
581 respiration in tundra ecosystems. *Glob. Change Biol.*, DOI:10.1111/gcb.14578, *In Press*,  
582 2019.

583 Lloyd, J. and Taylor, J. A.: On the temperature dependence of soil respiration. *Funct. Ecol.*, 8,  
584 315-323, <http://dx.doi.org/10.2307/2389824>, 1994.

585 Li, H. J., Yan, J. X., Yue, X. F., and Wang, M. B.: Significance of soil temperature and moisture  
586 for soil respiration in a Chinese mountain area. *Agric. For. Meteorol.*, 148, 490-503,  
587 <http://dx.doi.org/10.1016/j.agrformet.2007.10.009>, 2008.

588 Lin, X. W., Zhang, Z. H., Wang, S. P., Hu, Y. G., Xu, G. P., Luo, C. Y., Chang, X. F., Duan, J.  
589 C., Lin, Q. Y., Xu, B., Wang, Y. F., Zhao, X. Q., and Xie, Z. B.: Response of ecosystem  
590 respiration to warming and grazing during the growing seasons in the alpine meadow on  
591 the Tibetan plateau. *Agric. For. Meteorol.*, 151, 792-802,  
592 <http://dx.doi.org/10.1016/j.agrformet.2011.01.009>, 2011.

593 Litton, C. M. and Giardina, C. P.: Below-ground carbon flux and partitioning: global patterns  
594 and response to temperature. *Funct. Ecol.*, 22, 941-954, [http://dx.doi.org/10.1111/j.1365-](http://dx.doi.org/10.1111/j.1365-2435.2008.01479.x)  
595 [2435.2008.01479.x](http://dx.doi.org/10.1111/j.1365-2435.2008.01479.x), 2008.

596 Liu, L. T., Hu, C. S., Yang, P. P., Ju, Z. Q., Olesen, J. E., and Tang, J. W.: Effects of experimental  
597 warming and nitrogen addition on soil respiration and CH<sub>4</sub> fluxes from crop rotations of  
598 winter wheat–soybean/fallow. *Agric. For. Meteorol.*, 207, 38-47,  
599 <https://doi.org/10.1016/j.agrformet.2015.03.013>, 2015.

600 Liu, L., Wang, X., Lajeunesse, M. J., Miao, G., Piao, S., Wan, S., Wu, Y., Wang, Z., Yang, S.,  
601 Li, P. and Deng, M.: A cross-biome synthesis of soil respiration and its determinants under  
602 simulated precipitation changes. *Glob. Change Biol.*, 22, 1394–1405,  
603 <http://dx.doi.org/10.1111/gcb.13156>, 2016a.

604 Liu, T., Xu, Z. Z., Hou, Y. H., and Zhou, G. S.: Effects of warming and changing precipitation  
605 rates on soil respiration over two years in a desert steppe of northern China. *Plant Soil*,  
606 400, 15–27, <http://dx.doi.org/10.1007/s11104-015-2705-0>, 2016b.

607 Liu, W. X., Jiang, L., Hu, S. J., Li, L. H., Liu, L. L., and Wan, S. Q.: Decoupling of soil  
608 microbes and plants with increasing anthropogenic nitrogen inputs in a temperate steppe.  
609 *Soil Biol. Biochem.*, 72, 116-122, <http://dx.doi.org/10.1016/j.soilbio.2014.01.022>, 2014.

610 Liu, W. X., Zhang, Z., and Wan, S. Q.: Predominant role of water in regulating soil and  
611 microbial respiration and their responses to climate change in a semiarid grassland. *Glob.*  
612 *Change Biol.*, 15, 184-195, <http://dx.doi.org/10.1111/j.1365-2486.2008.01728.x>, 2009.

613 Liu, X. Z., Wan, S. Q., Su, B., Hui, D. F., and Luo, Y. Q.: Response of soil CO<sub>2</sub> efflux to water  
614 manipulation in a tallgrass prairie ecosystem. *Plant Soil*, 240, 213-223,  
615 <http://dx.doi.org/10.1023/a:1015744126533>, 2002.

616 Luo, Y. Q., Wan, S. Q., Hui, D. F., and Wallace, L. L.: Acclimatization of soil respiration to  
617 warming in a tall grass prairie. *Nature*, 413, 622-625, <http://dx.doi.org/10.1038/35098065>,  
618 2001.

619 Ma, Y. C., Piao, S. L., Sun, Z. Z., Lin, X., Wang, T., Yue, C., and Yang, Y.: Stand ages regulate  
620 the response of soil respiration to temperature in a *Larix principis-rupprechtii* plantation.  
621 *Agric. For. Meteorol.*, 184, 179-187, <http://dx.doi.org/10.1016/j.agrformet.2013.10.008>,  
622 2014.

623 Maestre, F. T., Salguero-Gómez, R. and Quero, J. L.: It is getting hotter in here: determining  
624 and projecting the impacts of global environmental change on drylands. *Philos. T. R. Soc.*  
625 *B.*, 367, 3062-3075, <http://dx.doi.org/10.1098/rstb.2011.0323>, 2012.

626 Meyer, N., Welp, G., and Amelung, W.: The temperature sensitivity ( $Q_{10}$ ) of soil respiration:  
627 controlling factors and spatial prediction at regional scale based on environmental soil  
628 classes. *Glob. Biogeochem. Cycle*, 32, 306-323,  
629 <http://dx.doi.org/10.1002/2017GB005644>, 2018.

630 Moyano, F. E., Manzoni, S., and Chenu, C.: Responses of soil heterotrophic respiration to  
631 moisture availability: an exploration of processes and models. *Soil Biol. Biochem.*, 59,  
632 72-85, <http://dx.doi.org/10.1016/j.soilbio.2013.01.002>, 2013.

633 Moyano, F. E., Vasilyeva, N., Bouckaert, L., Cook, F., Craine, J., Yuste, J. C., Don, A., Epron,  
634 D., Formanek, P., Franzluebbers, A., Ilstedt, U., Kätterer, T., Orchard, V., Reichstein, M.,  
635 Rey, A., Ruamps, L., Subke, J. A., Thomsen, I. K., and Chenu, C.: The moisture response  
636 of soil heterotrophic respiration: interaction with soil properties. *Biogeosciences*, 8, 1173-  
637 1182, <http://dx.doi.org/10.5194/bg-9-1173-2012>, 2012.

638 Martins, C. S. C., Macdonald, C. A., Anderson, I. C., and Singh, B. K.: Feedback responses of  
639 soil greenhouse gas emissions to climate change are modulated by soil characteristics in  
640 dryland ecosystems. *Soil Biol. Biochem.*, 100, 21-32,  
641 <http://dx.doi.org/10.1016/j.soilbio.2016.05.007>, 2016.

642 Moncrieff, J. B., and Fang, C.: A model for soil CO<sub>2</sub> production and transport 2: application to  
643 a Florida *Pinus elliotte* plantation. *Agric. For. Meteorol.*, 95, 237-256,  
644 [https://doi.org/10.1016/S0168-1923\(99\)00035-0](https://doi.org/10.1016/S0168-1923(99)00035-0), 1999.

645 Munson, S. M., Benton, T. J., Lauenroth, W. K., and Burke, I. C.: Soil carbon flux following  
646 pulse precipitation events in the shortgrass steppe. *Ecol. Res.*, 25, 205-211,  
647 <https://doi.org/10.1007/s11284-009-0651-0>, 2009.

648 Nelson, D. W. and Sommers, L. E.: Dry combustion method using medium temperature  
649 resistance furnace. In: Page AL, Miller RH, Keeney DR (eds). *Methods of Soil Analysis*,  
650 Part 2. Chemical and Microbial Properties. Madison, WI: American Society of Agronomy  
651 and Soil Science Society of America, 539-79, 1982.

652 Prietzel, J., Zimmermann, L., Schubert, A., and Christophel, D.: Organic matter losses in  
653 German Alps forest soils since the 1970s most likely caused by warming. *Nat. Geosci.*, 9,  
654 543-548, <http://dx.doi.org/10.1038/ngeo2732>, 2016.

655 Rinnan, R., Michelsen, A., Bååth, E., and Jonasson, S.: Fifteen years of climate change  
656 manipulations alter soil microbial communities in a subarctic heath ecosystem. *Glob.*  
657 *Change Biol.*, 13, 28-39, <http://dx.doi.org/10.1111/j.1365-2486.2006.01263.x>, 2007.

658 Rinnan, R., Stark, S., and Tolvanen, A.: Responses of vegetation and soil microbial  
659 communities to warming and simulated herbivory in a subarctic heath. *J. Ecol.*, 97, 788-  
660 800, <http://dx.doi.org/10.1111/j.1365-2745.2009.01506.x>, 2009.

661 Reynolds, L. L., Johnson, B. R., Pfeifer-Meister, L., and Bridgham, S. D.: Soil respiration  
662 response to climate change in Pacific Northwest prairies is mediated by a regional  
663 Mediterranean climate gradient. *Glob. Change Biol.*, 21:487–500,  
664 <http://dx.doi.org/10.1111/gcb.12732>, 2015.

665 Roby, M. C., Scott, R. L., Barron-Gafford, G. A., Hamerlynck, E. P., Moore, D. J.:  
666 **Environmental and vegetative controls on soil CO<sub>2</sub> efflux in three semiarid ecosystems.**  
667 *Soil Syst.*, 3, 6, <https://doi.org/10.3390/soilsystems3010006>, 2019.

668 Romero-Olivares, A. L., Allison, S. D., and Treseder, K. K.: Soil microbes and their response  
669 to experimental warming over time: A meta-analysis of field studies. *Soil Biol. Biochem.*,  
670 107, 32-40, <http://dx.doi.org/10.1016/j.soilbio.2016.12.026>, 2017.

671 Ru, J., Zhou, Y., Hui, D., Zheng, M., and Wan, S.: Shifts of growing-season precipitation peaks  
672 decrease soil respiration in a semiarid grassland. *Glob. Change Biol.*, 24, 1001-1011,  
673 <http://dx.doi.org/10.1111/gcb.13941>, 2018.

674 Savage, K., Davidson, E. A., Richardson, A. D., and Hollinger, D. Y.: Three scales of temporal  
675 resolution from automated soil respiration measurements. *Agric. For. Meteorol.*, 149:  
676 2012–202, <http://dx.doi.org/10.1016/j.agrformet.2009.07.008>, 2009.

677 Schlesinger, W. H.: Carbon balance in terrestrial detritus. *Annu. Rev. Ecol. Evol. Syst.*, 8, 51–  
678 81, <http://dx.doi.org/10.1146/annurev.es.08.110177.000411>, 1977.

679 Shen, Z. X., Li, Y. L., and Fu, G.: Response of soil respiration to short-term experimental  
680 warming and precipitation pulses over the growing season in an alpine meadow on the  
681 Northern Tibet. *Appl. Soil Ecol.*, 90, 35-40,  
682 <http://dx.doi.org/10.1016/j.apsoil.2015.01.015>, 2015.

683 Sierra C. A., Trumbore S. E., Davidson E. A., Vicca S., and Janssens I.: Sensitivity of  
684 decomposition rates of soil organic matter with respect to simultaneous changes in  
685 temperature and moisture. *J. Adv. Model. Earth Syst.*, 7: 335–356,  
686 <http://dx.doi.org/10.1002/2014MS000358>, 2015.

687 Song, W. M., Chen, S. P., Wu, B., Zhu, Y. J., Zhou, Y. D., Lu, Q., and Lin, G. H.: Simulated  
688 rain addition modifies diurnal patterns and temperature sensitivities of autotrophic and  
689 heterotrophic soil respiration in an arid desert ecosystem. *Soil Biol. Biochem.*, 82, 143-

690 152, <http://dx.doi.org/10.1016/j.soilbio.2014.12.020>, 2015.

691 **Sponseller, R. A.: Precipitation pulses and soil CO<sub>2</sub> flux in a Sonoran Desert ecosystem. *Glob.***  
692 ***Change Biol.*, 13(2), 426-436, <https://doi.org/10.1111/j.1365-2486.2006.01307.x>, 2007.**

693 Thakur, M. P., Del Real, I. M., Cesarz, S., Steinauer, K., Reich, P. B., Hobbie, S., Ciobanu, M.,  
694 Rich, R., Worm, K., and Eisenhauer, N.: Soil microbial, nematode, and enzymatic  
695 responses to elevated CO<sub>2</sub>, N fertilization, warming, and reduced precipitation. *Soil Biol.*  
696 *Biochem.*, 135, 184-193, <http://dx.doi.org/10.1016/j.soilbio.2019.04.020>, 2019.

697 Tucker, C. L. and Reed, S. C.: Low soil moisture during hot periods drives apparent negative  
698 temperature sensitivity of soil respiration in a dryland ecosystem: a multi-model  
699 comparison. *Biogeochemistry*, 128: 155–169, [http://dx.doi.org/10.1007/s10533-016-](http://dx.doi.org/10.1007/s10533-016-0200-1)  
700 [0200-1](http://dx.doi.org/10.1007/s10533-016-0200-1), 2016.

701 Wang, Y., Hao, Y., Cui, X. Y., Zhao, H., Xu, C., Zhou, X., and Xu, Z.: Responses of soil  
702 respiration and its components to drought stress. *J. Soils Sedim.*, 14, 99-109,  
703 <http://dx.doi.org/10.1007/s11368-013-0799-7>, 2014.

704 Wan, S. Q., Hui, D. F., Wallace, L., and Luo, Y. Q.: Direct and indirect effects of experimental  
705 warming on ecosystem carbon processes in a tallgrass prairie. *Glob. Biogeochem. Cycle*,  
706 19, 1-13, <http://dx.doi.org/10.1029/2004GB002315>, 2005.

707 Wan, S. Q., Norby, R. J., Ledford, J., and Weltzin, J. F.: Responses of soil respiration to  
708 elevated CO<sub>2</sub>, air warming, and changing soil water availability in a model old-field  
709 grassland. *Glob. Change Biol.*, 13, 2411-2424, [http://dx.doi.org/10.1111/j.1365-](http://dx.doi.org/10.1111/j.1365-2486.2007.01433.x)  
710 [2486.2007.01433.x](http://dx.doi.org/10.1111/j.1365-2486.2007.01433.x), 2007.

711 Wan, S. Q., Norby, R. J., Pregitzer, K. S., Ledford, J., and O'Neill, E. G.: CO<sub>2</sub> enrichment and  
712 warming of the atmosphere enhance both productivity and mortality of maple tree fine  
713 roots. *New Phytol.*, 162, 437-446, <http://dx.doi.org/10.1111/j.1469-8137.2004.01034.x>,  
714 2004.

715 Xu, Z., Hou, Y., Zhang, L., Tao, L., and Zhou, G.: Ecosystem responses to warming and  
716 watering in typical and desert steppes. *Sci., Rep.*, 6, 34801,  
717 <http://dx.doi.org/10.1038/srep34801>, 2016.

718 Yan, M. F., Zhou, G. S., and Zhang, X. S.: Effects of irrigation on the soil CO<sub>2</sub> efflux from  
719 different poplar clone plantations in arid northwest China. *Plant Soil*, 375, 89-97,  
720 <http://dx.doi.org/10.1007/s11104-013-1944-1>, 2013.

721 **Yan, Z. B., Bond-Lamberty, K. E., Todd-Brown, V. L., Bailey, S., Li, C., Liu, C. Q., Liu C.: A**  
722 **moisture function of soil heterotrophic respiration that incorporates microscale processes,**  
723 ***Nat. Commun.*, 9, 2562, <http://doi:10.1038/s41467-018-04971-6>, 2018.**

724 Yin, X., Goudriaan, J. A. N., Lantinga, E. A., Vos, J. A. N., and Spiertz, H. J.: A flexible  
725 Gompertz function of determinate growth. *Ann. Bot.*, 91, 361–371,  
726 <http://aob.oupjournals.org/cgi/doi/10.1093/aob/mcg029>, 2003.

- 727 Yu, H. Y., Chen, Y. T., Xu, Z. Z., and Zhou, G. S.: Analysis of relationships among leaf  
728 functional traits and economics spectrum of plant species in the desert steppe of Nei  
729 Mongol. *Chin. J. Plant Ecol.*, 38, 1029-1040, doi: 10.3724/SP.J.1258.2014.00097, 2014.
- 730 Zhang, C. P., Niu, D. C., Hall, S. J., Wen, H. Y., Li, X. D., Fu, H., Wan, C. G., and Elser, J. J.:  
731 Effects of simulated nitrogen deposition on soil respiration components and their  
732 temperature sensitivities in a semiarid grassland. *Soil Biol. Biochem.*, 75, 113-123,  
733 <http://dx.doi.org/10.1016/j.soilbio.2014.04.013>, 2014.
- 734 Zhang, N. L., Wan, S. Q., Li, L. H., Bi, J., Zhao, M. M., and Ma, K. P.: Impacts of urea N  
735 addition on soil microbial community in a semi-arid temperate steppe in northern China.  
736 *Plant Soil*, 311, 19-28, <http://dx.doi.org/10.1007/s11104-008-9650-0>, 2008.
- 737 Zhang, W., Parker, K. M., Luo, Y., Wan, S., Wallace, L. L., and Hu, S.: Soil microbial responses  
738 to experimental warming and clipping in a tallgrass prairie. *Glob. Change Biol.*, 11, 266-  
739 277, <http://dx.doi.org/10.1111/j.1365-2486.2005.00902.x>, 2005.

740 **Figure legends**

741 Figure 1. Effects of warming on the soil temperature and soil moisture during the  
742 growth peak in 2014 (Mean  $\pm$  SE). Mean daily values were presented (n = 120).  
743 The mean values with the same lowercase letters on the SE bars are not different  
744 at  $P < 0.05$  according to LSD multiple range tests ( $P$  values and F ratios are shown  
745 inside).

746 Figure 2. Relationship between  $R_s$  and soil water content based on a linear (blue  
747 line) and a quadratic (black line) functional model (A), and Gompertz functional  
748 model (B). Close and open circles denote the data in 2014 and 2017, respectively.  
749 The close red circles indicate data used for the linear  $R_s$  response to SWC at low  
750 levels. The one open triangle may be an outlier point due to some errors, but it does  
751 not notably affect the functional fitting when removing it (ref. Figure S2). Based  
752 on Gompertz functional curve, the  $R_s$  asymptote value, as an estimated maximum,  
753 is  $3.76 \mu\text{mol}\cdot\text{m}^{-2}\cdot\text{s}^{-1}$  when the optimal SWC is 22.85% [The red line denotes the  
754 initial  $R_s$  response to SWC; the blue line denotes  $R_s = \text{constant}$  value of the  
755 maximum estimated by the asymptote value; and the intersection of the two lines  
756 represents a point (the blue arrow) at which  $R_s$  levelled off]. Note, we measured  
757 the  $R_s$  during 9:00-10:00 in these cloudless days with calm/gentle wind in order to  
758 maintain other environmental factors such as soil temperature and radiation to  
759 relatively stable and constant. The data were collected in the plots of watering  
760 treatments (n = 92)..

761 Figure 3. The relationships between soil respiration and soil temperature under  
762 both watering (n = 23-25, A), and warming treatments (n=28-33, B) (Mean  $\pm$  SE).

763 Figure 4. Effects of warming regimes on soil respiration in 2014 (mean  $\pm$  SE), the  
764 mean values with the same lowercase letters on the SE bars are not different at  $P$   
765  $< 0.05$  according to LSD multiple range tests ( $P$  values and F ratios are shown  
766 inside).

767 Figure 5. An interactive relationship of soil respiration with both soil temperature  
768 ( $T_s$ ) and soil water content (SWC) based on a nonlinear mixed model ( $R_s =$   
769  $(0.733*1.796^{(T_s-10)/10})*\beta^{(0.229-SWC)^2}$ ). The data were used in control plots in the  
770 warming experiment. The optimal SWC of 0.229 was estimated by the Gompertz  
771 functional curve (see Figure 2B).

772 Figure 6. A diagram of the effects of key environmental factors on soil respiration  
773 and their relationships. Blue double-headed arrows represent the relationships  
774 between the key environmental factors, data on the arrows are correlation  
775 coefficients. Black arrows represent the relationships between soil respiration and  
776 the key environmental factors, data on the arrows are correlation coefficients (bold)  
777 and direct path coefficients (italic), respectively. \*,  $P < 0.05$ ; \*\*,  $P < 0.01$ , n = 12.  
778 For other details, see Supplementary Table S2.

779

780 Supplementary Figure S1. Long-term air temperature (A) and total annual



781 precipitation (B) records from 1955 to 2014 in the experiment site in the desert  
782 steppe ecosystem, Damao Banner, Nei Mongol, China.  
783 Supplementary Figure S2. Relationship between  $R_s$  and soil water content based  
784 on a linear (black line) and a quadratic (dotted line) functional model (A), and  
785 Gompertz functional model (B). Close and open circles denote the data in 2014  
786 and 2017, respectively. The close red circles indicate data used for the initial  $R_s$   
787 response to SWC. The functional fitting does not substantially affect despite a  
788 slight improvement with greater  $R^2$  values when the outlier point was removed (ref.  
789 Figure 2). Note, we measured the  $R_s$  during 9:00-10:00 in the cloudless days with  
790 calm/gentle wind in order to maintain other environmental factors such as soil  
791 temperature and radiation to relatively stable and constant ( $n = 91$ ).

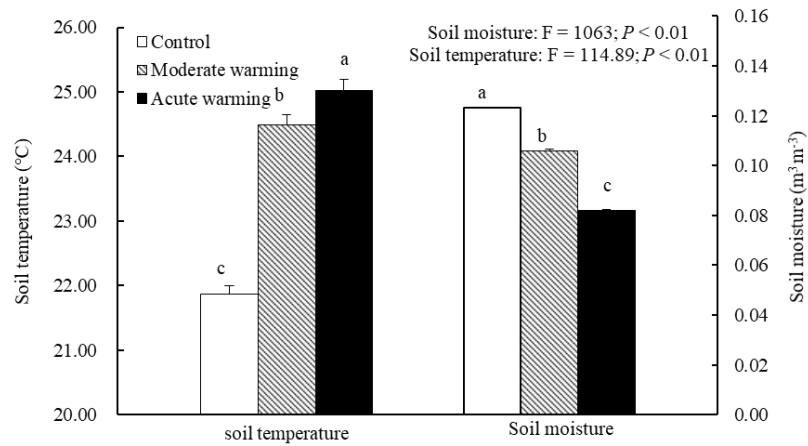

792 **Figure 1.** Effects of warming on the soil temperature and soil moisture during the growth  
 793 peak in 2014 (Mean  $\pm$  SE). Mean daily values were presented ( $n = 120$ ). The mean values with  
 794 the same lowercase letters on the SE bars are not different at  $P < 0.05$  according to LSD  
 795 multiple range tests ( $P$  values and  $F$  ratios are shown inside).

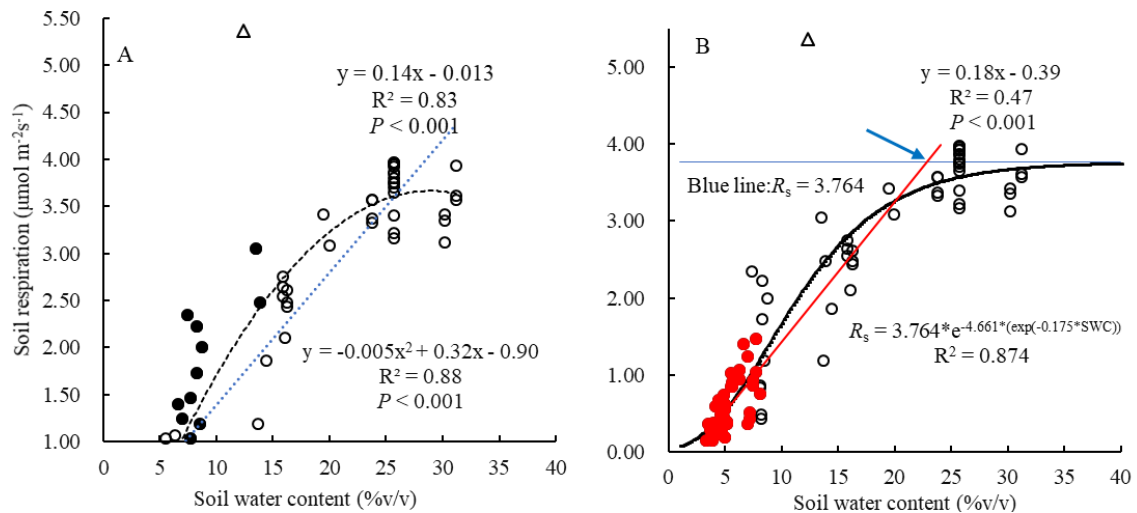

796 **Figure 2.** Relationship between  $R_s$  and soil water content based on a linear (blue line) and a  
 797 quadratic (black line) functional model (A), and Gompertz functional model (B). Close and  
 798 open circles denote the data in 2014 and 2017, respectively. The close red circles indicate data  
 799 used for the linear  $R_s$  response to SWC at low levels. The one open triangle may be an outlier  
 800 point due to some errors, but it does not notably affect the functional fitting when removing it  
 801 (ref. Figure S2). Based on Gompertz functional curve, the  $R_s$  asymptote value, as an estimated  
 802 maximum, is  $3.76 \mu\cdot\text{mol}\cdot\text{m}^{-2}\cdot\text{s}^{-1}$  when the optimal SWC is 22.85% [The red line denotes the  
 803 initial  $R_s$  response to SWC; the blue line denotes  $R_s = \text{constant}$  value of the maximum estimated  
 804 by the asymptote value; and the intersection of the two lines represents a point (the blue arrow)  
 805 at which  $R_s$  levelled off]. Note, we measured the  $R_s$  during 9:00-10:00 in these cloudless days  
 806 with calm/gentle wind in order to maintain other environmental factors such as soil  
 807 temperature and radiation to relatively stable and constant. The data were collected in the plots  
 808 of watering treatments (n = 92).

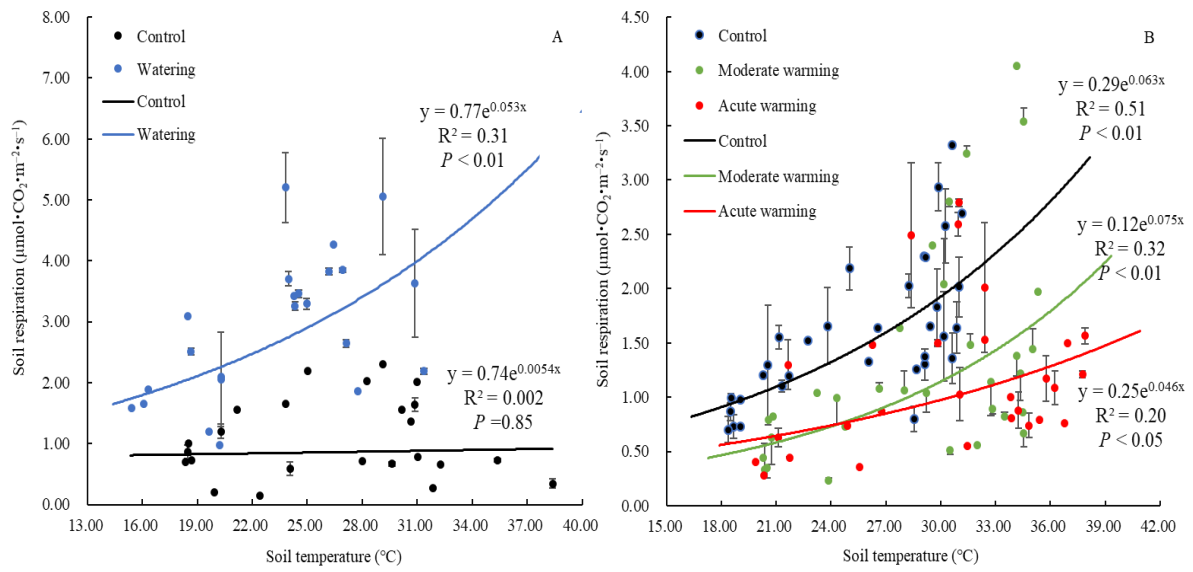

809 **Figure 3.** The relationships between soil respiration and soil temperature under both watering  
 810 (n = 23-25, A), and warming treatments (n=28-33, B) (Mean ± SE).  
 811

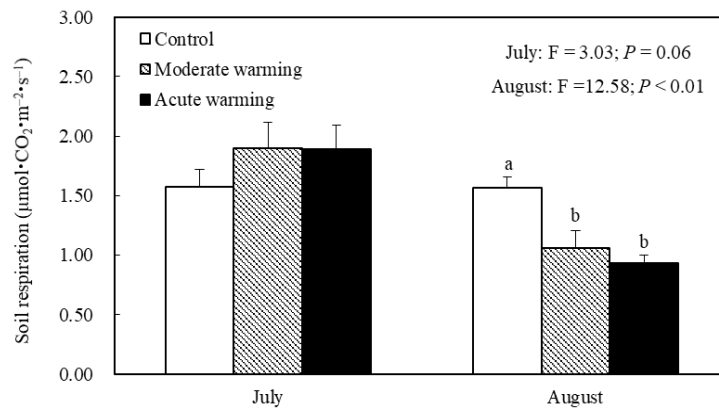

812 **Figure 4.** Effects of warming regimes on soil respiration in 2014 (mean  $\pm$  SE), the mean values  
 813 with the same lowercase letters on the SE bars are not different at  $P < 0.05$  according to LSD  
 814 multiple range tests ( $P$  values and F ratios are shown inside).

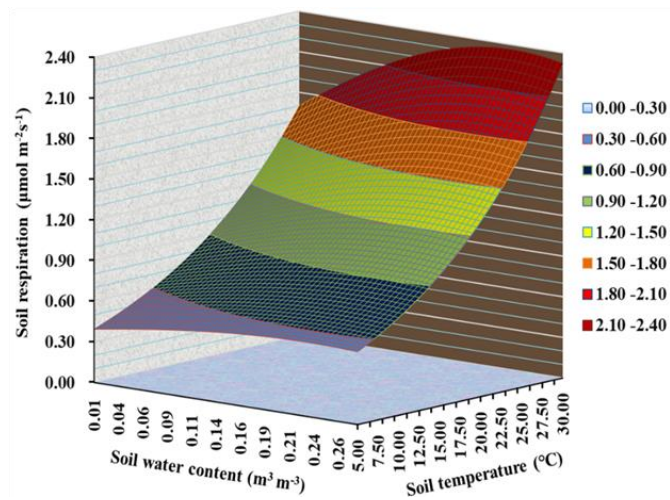

815 **Figure 5.** An interactive relationship of soil respiration with both soil temperature (Ts) and soil  
 816 water content (SWC) based on a nonlinear mixed model ( $R_s = (0.733 * 1.796^{(T_s-10)/10}) * \beta^{(0.229-SWC)^2}$ ,  
 817 B). The data were used in control plots in the warming experiment. The optimal SWC of 0.229  
 818 was estimated by the Gompertz functional curve (see Figure 2B).  
 819



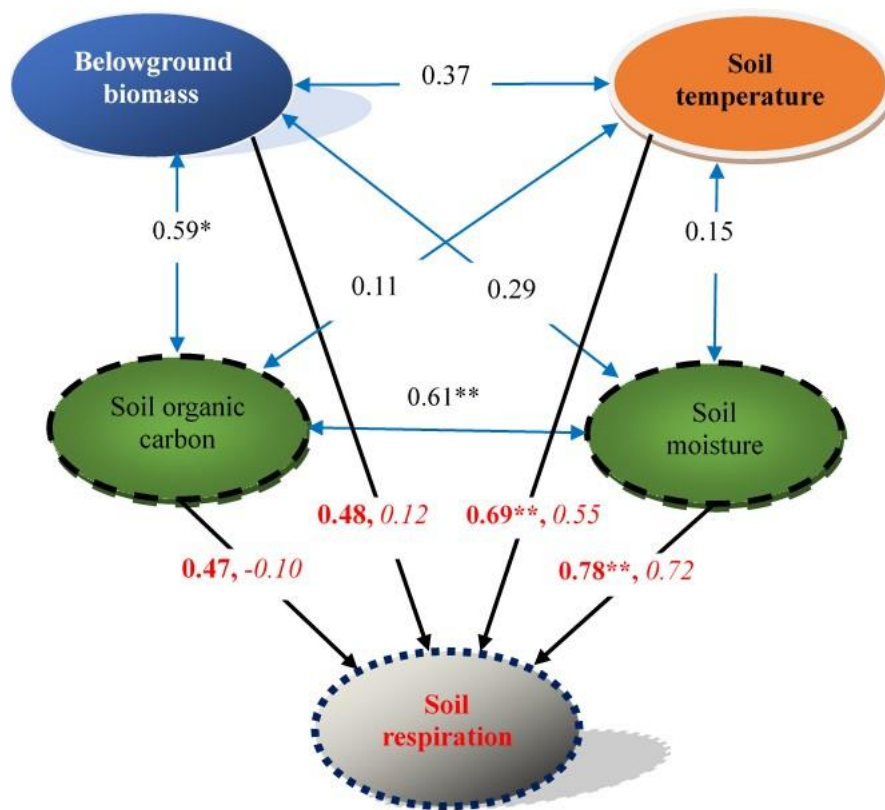

820 **Figure 6.** A diagram of the effects of key environmental factors on soil respiration and their  
 821 relationships. Blue double-headed arrows represent the relationships between the key  
 822 environmental factors, data on the arrows are correlation coefficients. Black arrows represent  
 823 the relationships between soil respiration and the key environmental factors, data on the arrows  
 824 are correlation coefficients (bold) and direct path coefficients (italic), respectively. \*,  $P < 0.05$ ;  
 825 \*\*,  $P < 0.01$ ,  $n = 12$ . For other details, see Supplementary Table S2.  
 826  
 827

828

829 Supplement of

830

831 **Soil carbon release responses to long-term versus short-term climatic**  
832 **warming in an arid ecosystem**

833

834 Hongying Yu et al.

835 Correspondence to: Zhenzhu Xu (xuzz@ibcas.ac.cn)

836

837

838 **Supplementary Tables**

839 **Supplementary Table S1** The belowground biomass, soil nutrition, and microbial  
840 characteristics in 0–10 cm depth soil profile under the control, long-term and moderate, and  
841 short-term and acute warming treatments (mean  $\pm$  SE, n = 3-6).

| Soil variables                                         | Control            | Moderately Warmed  | Acutely Warmed                  | <i>F</i> | <i>P</i> |
|--------------------------------------------------------|--------------------|--------------------|---------------------------------|----------|----------|
| BB (g soil-collar <sup>-1</sup> )                      | 1.91 $\pm$ 0.81    | 0.93 $\pm$ 0.56    | <b>1.15<math>\pm</math>0.58</b> | 0.44     | 0.66     |
| SOC (g·kg <sup>-1</sup> )                              | 13.41 $\pm$ 0.70   | 12.06 $\pm$ 1.22   | 11.18 $\pm$ 0.62                | 1.85     | 0.21     |
| NH <sub>4</sub> <sup>+</sup> -N (mg·kg <sup>-1</sup> ) | 7.18 $\pm$ 0.78    | 8.54 $\pm$ 1.05    | 6.69 $\pm$ 1.27                 | 0.74     | 0.51     |
| NO <sub>3</sub> <sup>-</sup> -N (mg·kg <sup>-1</sup> ) | 6.72 $\pm$ 1.13    | 6.43 $\pm$ 1.53    | 8.43 $\pm$ 1.74                 | 0.48     | 0.63     |
| MBC (mg·kg <sup>-1</sup> )                             | 165.53 $\pm$ 25.07 | 175.49 $\pm$ 38.96 | 170.95 $\pm$ 36.27              | 0.03     | 0.97     |
| MBN (mg·kg <sup>-1</sup> )                             | 11.17 $\pm$ 2.23   | 13.44 $\pm$ 4.04   | 12.88 $\pm$ 4.50                | 0.15     | 0.86     |

842 BB, SOC, NH<sub>4</sub><sup>+</sup>-N, and NO<sub>3</sub><sup>-</sup>-N represent belowground biomass, soil organic carbon, ammonium- and  
843 nitrate-nitrogen concentrations, respectively; and MBC and MBN represent soil microbial biomass carbon,  
844 and nitrogen concentrations, respectively. The BB dry weight was determined with a precision balances (its  
845 readability $\geq$  0.001 g), and soil dry sample weight was measured on an analytical balance (readability $\geq$   
846 0.0001 g) semi-analytical balance, respectively.

847

848 **Supplementary Table S2** Path analysis between soil respiration ( $R_s$ ) and key factors.

| Variables of the key factors  | Correlation<br>coefficients with $R_s$ | Path<br>coefficients<br>(direct effects) | Indirect path coefficients<br>(indirect effects) |       |       |       |       |
|-------------------------------|----------------------------------------|------------------------------------------|--------------------------------------------------|-------|-------|-------|-------|
|                               |                                        |                                          | $X_1$                                            | $X_2$ | $X_3$ | $X_4$ | Total |
| Soil moisture ( $X_1$ )       | 0.78**                                 | 0.72                                     |                                                  | 0.08  | 0.03  | -0.06 | 0.06  |
| Soil temperature ( $X_2$ )    | 0.69**                                 | 0.55                                     | 0.11                                             |       | 0.04  | -0.01 | 0.14  |
| Belowground biomass ( $X_3$ ) | 0.48                                   | 0.12                                     | 0.21                                             | 0.20  |       | -0.06 | 0.36  |
| Soil organic carbon ( $X_4$ ) | 0.47                                   | -0.10                                    | 0.44                                             | 0.06  | 0.07  |       | 0.57  |

849 \*,  $P < 0.05$ ; \*\*  $P < 0.01$ ,  $n = 12$ .

850

851

852 **Supplementary Figures**

853

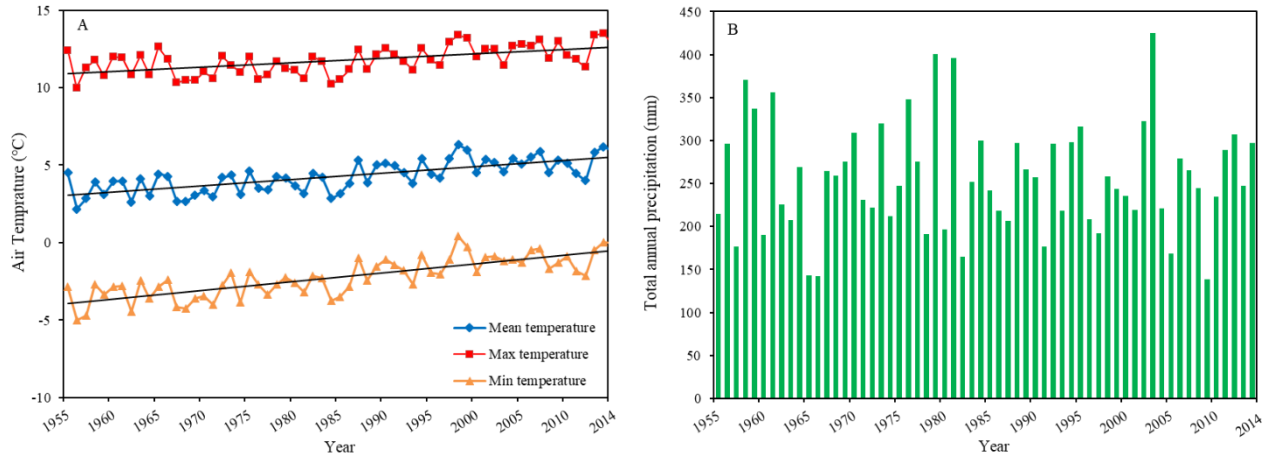

854 **Supplementary Figure S1.** Long-term air temperature (A) and total annual precipitation (B)  
855 records from 1955 to 2014 in the experiment site in the desert steppe ecosystem, Damao  
856 Banner, Nei Mongol, China.

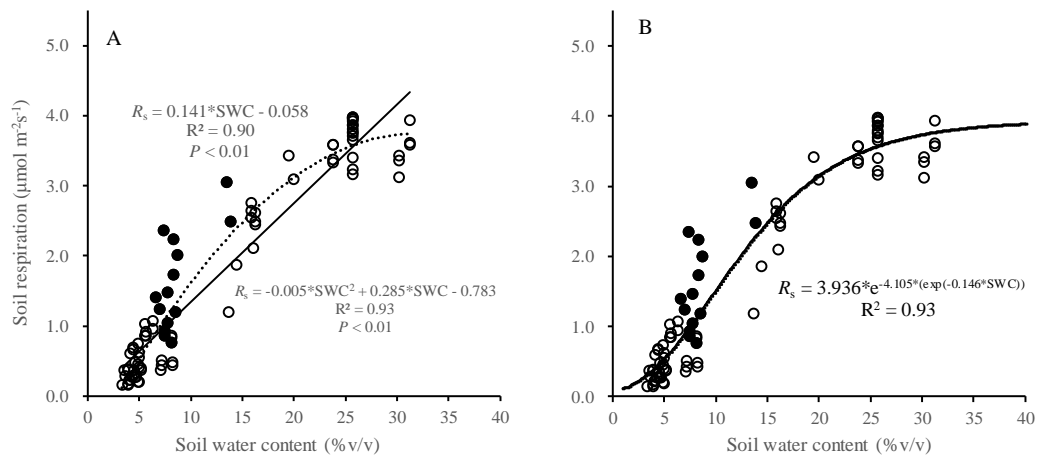

857 **Figure S2** Relationship between  $R_s$  and soil water content based on a linear (black line) and a  
 858 quadratic (dotted line) functional model (A), and Gompertz functional model (B). Close and  
 859 open circles denote the data in 2014 and 2017, respectively. The close red circles indicate data  
 860 used for the initial  $R_s$  response to SWC. The functional fitting does not substantially affect  
 861 despite a slight improvement with greater  $R^2$  values when the outlier point was removed (ref.  
 862 Figure 2). Note, we measured the  $R_s$  during 9:00-10:00 in the cloudless days with calm/gentle  
 863 wind in order to maintain other environmental factors such as soil temperature and radiation  
 864 to relatively stable and constant ( $n = 91$ ).

865  
 866
